# Supplementary material
Source: PubMed Central journal article supplement (PMC7737214)
Supplement: pt0c00125_si_001.pdf [file pt0c00125_si_001.pdf]

**Supplementary Information:**

**Selective Elimination of Osteosarcoma Cell Lines with Short Telomeres  
by Ataxia Telangiectasia and Rad3-Related Inhibitors**

Tomas Goncalves<sup>1,2</sup>, Georgia Zoumpoulidou<sup>3</sup>, Carlos Alvarez-Mendoza<sup>3</sup>, Caterina Mancusi<sup>3</sup>, Laura C. Collopy<sup>2</sup>, Sandra J. Strauss<sup>4,5</sup>, Sibylle Mitnacht<sup>3\*</sup> and Kazunori Tomita<sup>1,2\*</sup>

1. Centre for Genome Engineering and Maintenance, College of Health, Medicine and Life Sciences, Brunel University London, UK
2. Chromosome Maintenance Group, UCL Cancer Institute, University College London, UK
3. Cancer Cell Signalling, UCL Cancer Institute, University College London, UK
4. Department of Oncology, UCL Cancer Institute, University College London, UK
5. London Sarcoma Service, University College London Hospitals Foundation Trust, UK

\* co-corresponding authors

Table S-1 – Origin and Characteristics of the Osteosarcoma Cell Lines

Table S-2 – Telomere length measurement from TRF in Figure 1c

Table S-3 – IC50 drug response in osteosarcoma cell lines

Table S-4 – Oligonucleotides used for this study

Figure S-1 – Characterisation of Telomere Status in Osteosarcoma Cell Lines

Figure S-2 – APB Assay

Figure S-3 – ATRi concentration- survival curves in osteosarcoma lines

Figure S-4 – Relationship between sensitivity to methotrexate and telomere length

Figure S-5 – Comparison of ATRi sensitivities between ALT-negative and -positive lines

Figure S-6 – Selective death of osteosarcoma with short telomeres exposed to ATR inhibitor BAY-1895344

**Table S-1 – Origin and Characteristics of the Osteosarcoma Cell Lines**

| Cell Line             | Media   | Age (Years) <sup>a</sup> | Sex <sup>a</sup> | Reference <sup>b</sup>                     |
|-----------------------|---------|--------------------------|------------------|--------------------------------------------|
| HOS-MNNG <sup>c</sup> | RPMI    | 13                       | Female           | ATCC-CRL-1547                              |
| OHSN                  | RPMI    | 14                       | Male             | <i>Fodstad et al. 1986</i> <sup>1</sup>    |
| SJSA-1                | RPMI    | 19                       | Male             | ATCC-CRL-2098                              |
| HAL                   | RPMI    | 16                       | Male             | ExpASy (CVCL_D788)                         |
| 143b <sup>c</sup>     | DMEM    | 13                       | Female           | ATCC-CRL-8303                              |
| HOS                   | EMEM    | 13                       | Female           | ATCC-CRL-1543                              |
| MG-63                 | EMEM    | 14                       | Male             | ATCC-CRL-1427                              |
| MHM                   | RPMI    | 41                       | Female           | <i>Kjønniksen et al. 1994</i> <sup>2</sup> |
| HuO-3N1               | RPMI    | 15                       | Female           | ExpASy (CVCL_1297)                         |
| G292                  | McCoy's | 9                        | Female           | ATCC-CRL-1423                              |
| HuO-9                 | RPMI    | 13                       | Female           | ExpASy (CVCL_1298)                         |
| CAL72                 | DMEM    | 10                       | Male             | ExpASy (CVCL_1113)                         |
| U2OS                  | McCoy's | 15                       | Female           | ATCC-HTB-96                                |
| KPD                   | RPMI    | 7                        | Female           | <i>Bruland et al. 1988</i> <sup>3</sup>    |
| NY                    | RPMI    | 15                       | Male             | ExpASy (CVCL_1613)                         |
| SAOS-2                | DMEM    | 11                       | Female           | ATCC-HTB-85                                |
| LM7 <sup>d</sup>      | DMEM    | 11                       | Female           | <i>Jia et al. 1999</i> <sup>4</sup>        |

<sup>a</sup> Age and sex of the patient from whom the tumour originates

<sup>b</sup> Identifiers given for cell lines available at the ATCC or ExpASy

<sup>c</sup> metastatic derivatives of HOS; <sup>d</sup> metastatic derivative of SAOS-2

**Table S-2 – Telomere length measurement from TRF in Figure 1c**

| Cell Line | Telomere status | Mean Length (kb) | Median Length (kb) | Variance (kb <sup>2</sup> ) | Semi-interquartile range (kb) |
|-----------|-----------------|------------------|--------------------|-----------------------------|-------------------------------|
| HEK293T   | Control         | 6.64             | 5.74               | 16.72                       | 3.64                          |
| HOS-MNNG  | ST              | 5.21             | 2.98               | 20.44                       | 1.86                          |
| OHSN      | ST              | 5.02             | 3.22               | 19.12                       | 2.02                          |
| SJSA      | ST              | 4.83             | 3.21               | 17.93                       | 2.12                          |
| HAL       | ST              | 4.71             | 2.70               | 22.74                       | 1.90                          |
| 143b      | ST              | 4.42             | 2.96               | 16.21                       | 2.02                          |
| HOS       | ST              | 4.70             | 3.58               | 16.73                       | 2.36                          |
| MG-63     | LT              | 6.78             | 5.77               | 12.29                       | 4.46                          |
| MHM       | LT              | 6.73             | 6.37               | 12.94                       | 4.18                          |
| HuO-3N1   | LT              | 6.06             | 6.67               | 20.63                       | 1.76                          |
| G292      | ALT             | 21.54            | 10.69              | 524.47                      | 6.36                          |
| HuO-9     | ALT             | 17.27            | 9.67               | 348.21                      | 5.72                          |
| CAL72     | ALT             | 20.24            | 10.24              | 477.35                      | 6.22                          |
| U2OS      | ALT             | 25.21            | 13.72              | 577.77                      | 7.34                          |
| KPD       | ALT             | 18.95            | 9.95               | 392.04                      | 5.94                          |
| NY        | ALT             | 19.19            | 9.89               | 390.53                      | 5.84                          |
| SAOS-2    | ALT             | 13.81            | 7.61               | 251.98                      | 4.62                          |
| LM7       | ALT             | 15.56            | 8.20               | 293.43                      | 4.90                          |

ST – ALT-negative, short telomere

LT – ALT-negative, long telomere

ALT – ALT-positive

**Table S-3 – IC50 drug response in osteosarcoma cell lines**

| Cell Line | Telomere status | AZD-6738<br>μM | VE-822<br>μM | BEY-1895344<br>μM | Methotrexate<br>μM |
|-----------|-----------------|----------------|--------------|-------------------|--------------------|
| HOS-MNNG  | ST              | 0.29±0.02      | 0.12         | 0.017±0.001       | 0.04               |
| OHSN      | ST              | 0.66±0.18      | 0.25±0.06    | 0.013±0.001       | 0.20               |
| SJSA      | ST              | 22.68±3.49     | 1.98±0.18    | 0.537±0.128       | 0.30               |
| HAL       | ST              | 2.26±0.42      | 0.69±0.01    | 0.081±0.003       | 0.07               |
| 143b      | ST              | 0.69±0.14      | 0.09         | 0.018             | 0.02               |
| HOS       | ST              | 0.83±0.48      | 0.29±0.06    | 0.014±0.005       | 0.32               |
| MG-63     | LT              | 3.97±0.19      | 1.30         | 0.061             | 197.8              |
| MHM       | LT              | 2.20±0.45      | 0.36±0.05    | 0.044±0.002       | 67.87              |
| HuO-3N1   | LT              | 9.56±3.98      | 3.06±1.85    | 0.233±0.154       | 71.85              |
| G292      | ALT             | 3.16±2.66      | 1.30±1.12    | 0.152±0.070       | 69.11              |
| HuO-9     | ALT             | 1.08±0.57      | 0.75         | 0.024             | 0.06               |
| CAL72     | ALT             | 0.80±0.03      | 0.13         | 0.015±0.002       | 44.30              |
| U2OS      | ALT             | 4.91±2.16      | 1.44±0.18    | 0.066±0.016       | 0.03               |
| KPD       | ALT             | 2.01±1.70      | 0.18         | 0.678             | 57.84              |
| NY        | ALT             | 2.54±1.34      | 1.68         | 0.059             | 0.09               |
| SAOS-2    | ALT             | 5.17±1.29      | 1.58         | 0.206             | 0.01               |
| LM7       | ALT             | 9.92±0.71      | 1.80±0.49    | 0.574±0.365       | 0.60               |

**Table S-4 – Oligonucleotides used for this study**

| Oligo name  | Sequence                                         |
|-------------|--------------------------------------------------|
| hTeloG      | ACACTAAGGTTTGGGTTTGGGTTTGGGTTTGGGTTAGTGT         |
| hTeloC      | TGTTAGGTATCCCTATCCCTATCCCTATCCCTATCCCTAACA       |
| AlbuminF    | CGGCGGCGGGCGGCGCGGGCTGGGCGGAAATGCTGCACAGAATCCTTG |
| AlbuminR    | GCCCGGCCCGCCGCGCCCGTCCCGCCGAAAAGCATGGTCGCCTGTT   |
| GlobinF     | CGGCGGCGGGCGGCGCGGGCTGGGCGGCTTCATCCACGTTACCTTG   |
| GlobinR     | GCCCGGCCCGCCGCGCCCGTCCCGCCGAGGAGAAAGTCTGCCGTT    |
| CC-TeloF    | GGTTTTTGAGGGTGAGGGTGAGGGTGAGGGTGAGGGT            |
| CC-TeloR    | TCCGACTATCCCTATCCCTATCCCTATCCCTATCCCTA           |
| hTERT F1579 | GCTGACGTGGAAGATGAGCGTGC                          |
| hTERT R1616 | TCCTCACGCAGACGGTGCTCTG                           |
| hTERC F27   | GGTGGTGGCCATTTTTTGTG                             |
| hTERC R163  | GTAGAATGAACGGTGGAAG                              |
| 7SK F7      | GAGGGCGATCTGGCTGCGACAT                           |
| 7SK R112    | ACATGGAGCGGTGAGGGAGGAA                           |
| GAPDH F6    | GAAGGTGAAGGTCGGAGT                               |
| GAPDH R231  | GAAGATGGTGATGGGATTTTC                            |

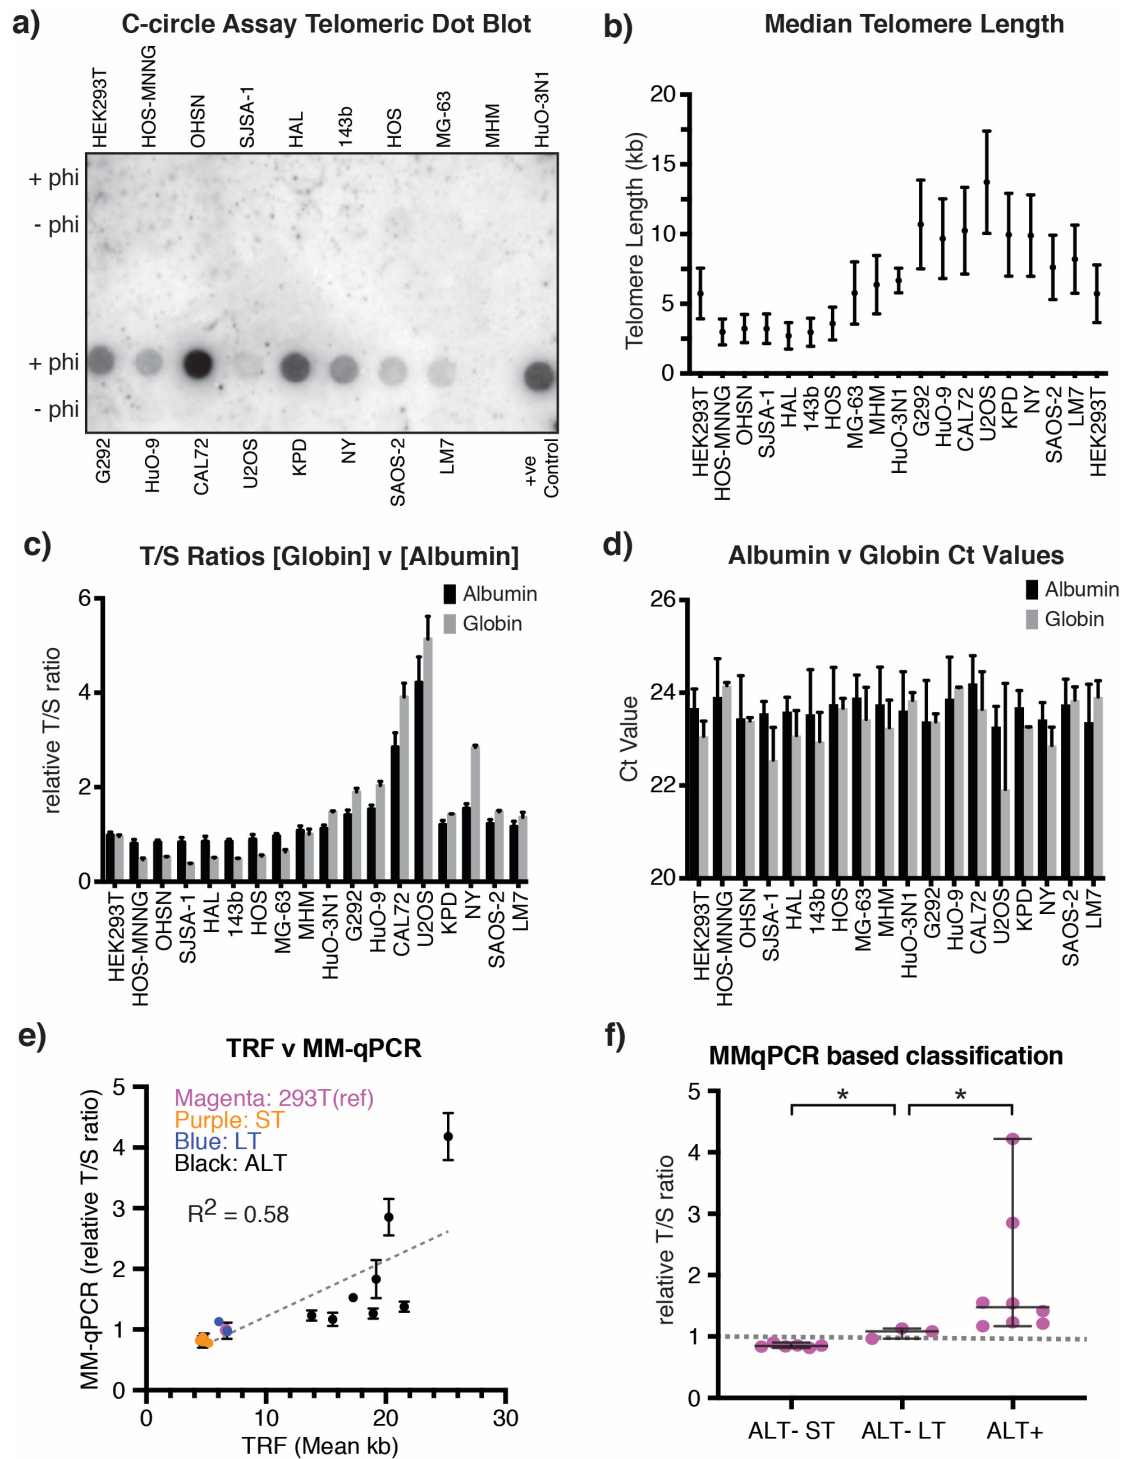

**Figure S-1 – Characterisation of Telomere Status in Osteosarcoma Cell Lines**

a) *Dot Blot from C-Circle Assay.* C-circle amplification products were detected by dot blot using a telomeric TTAGGG probe. The pCR4 plasmid containing telomeric repeats was used as a positive control. Phi indicates Phi-29 polymerase.

b) *Box plot of median telomere lengths from TRF analysis in Figure 1c as calculated by Telometric software.* Graph shows the median and interquartile range of the telomere fragments.

c) *Comparison of T/S ratios obtained using albumin or beta-globin as the single copy gene (SCG).* T/S ratio is expressed relative to the T/S ratio determined for HEK293T cell

line as expressed as the fold enrichment. Data represent the mean of three independent experiments, each MM-qPCR run in triplicate. Error bars show standard deviation.

d) Uniformity of Ct (cycle threshold) values obtained with *albumin* locus, compared to the *beta-globin* locus. Standard deviation, standard error of the mean and coefficient of variation for the *albumin* and *beta-globin* loci were 0.234 v 0.568, 0.055 v 0.134 and 0.99% v 2.43%, respectively).

e) Correlation graph between TRF-based and MM-qPCR-based telomere length measurements. T/S ratio was determined using *albumin* gene as a SCG, and are expressed relative to that in HEK293T cell line. Linear regression is indicated as grey dashed line. TMM status of the samples and reference HEK293T are colour coded as indicated.

f) MM-qPCR derived telomere repeats variation in OS cell lines grouped according to TMM status. The grey dashed line indicates the T/S ratio of HEK293T. Mann-Whitney U Test indicates  $p=0.0238$  and  $p=0.0121$  comparing ALT -ST vs ALT-LT and ALT+ vs ALT-LT, respectively.

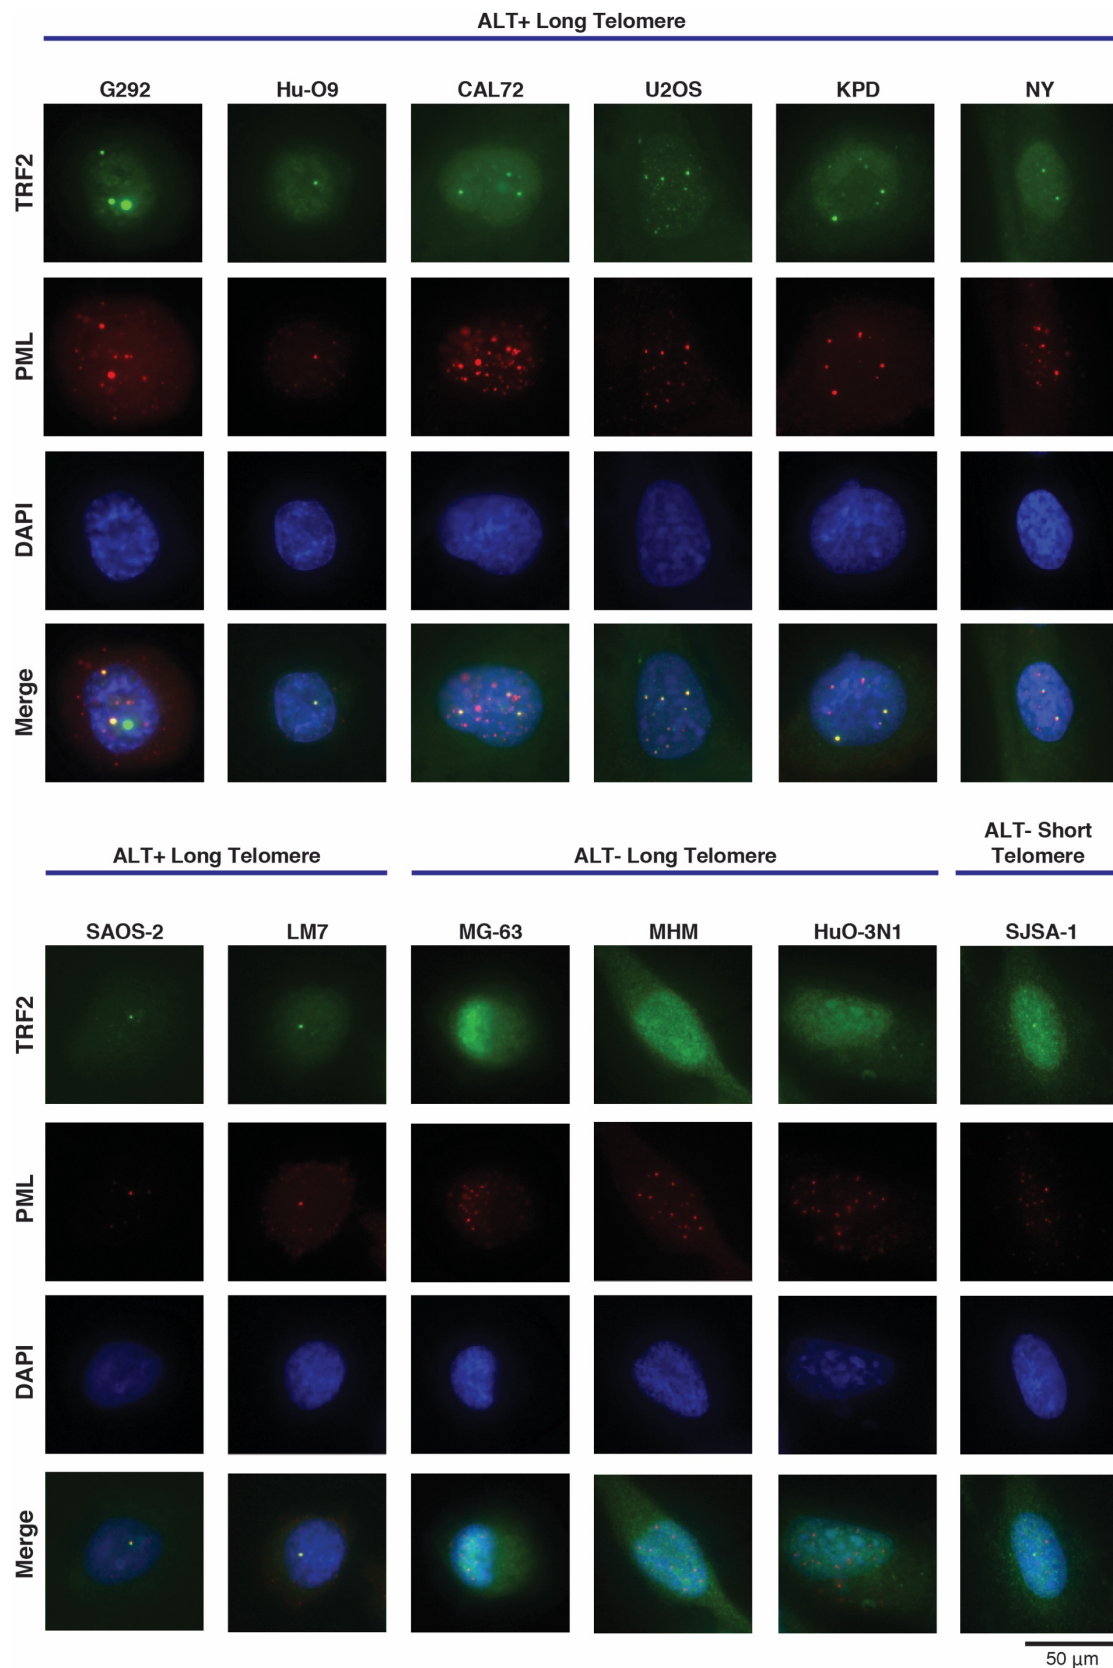

**Figure S-2 – APB Assay**

Representative immunofluorescence images showing the presence/absence of ALT associated PML bodies (APBs) in the osteosarcoma cell lines with long telomeres. SJSA-1 is shown as a negative control. A 50- $\mu$ m scale bar is shown.

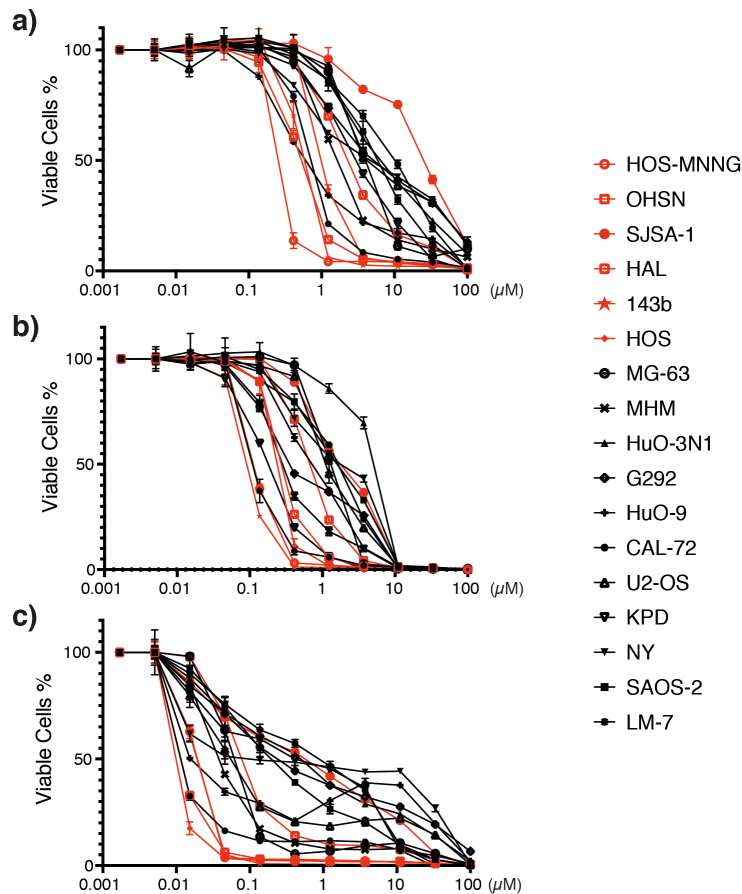

**Figure S-3 – ATRi concentration- survival curves in osteosarcoma lines**

Graph shows cell viability data used to generate AUC Data in Figure 3 to (a) ATRi AZD-6738, (b) VE-822 and (c) BAY-1895344. Osteosarcoma cell lines are grouped according to telomere length. Individual lines are represented by symbols on the right (short telomere lines n=6, long telomere lines n=11). Short telomere lines are highlighted in red. Curves are from one representative run of two or more runs. Data points represent mean of 3 technical replicates with error bars showing standard deviation.

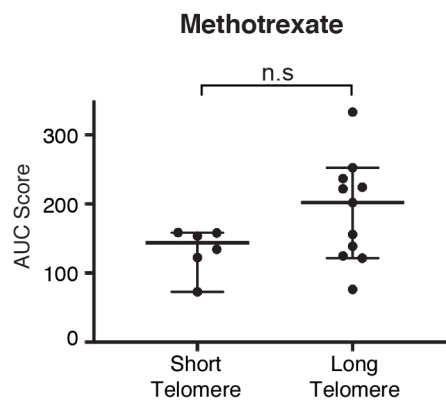

**Figure S-4 – Relationship between sensitivity to methotrexate and telomere length**

Graph shows AUC values deduced for dose response curves to methotrexate. Lines are grouped according to telomere length cell lines. Samples were assessed in triplicate and values averaged. Bars depict median and 95% CI. Mann-Whitney U Test specified p=0.1802, indicating no significant difference between groups.

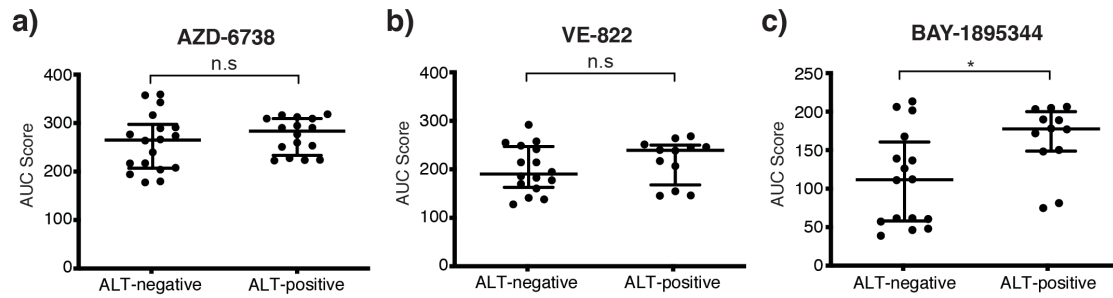

**Figure S-5 – Comparison of ATRi sensitivities between ALT negatives and positives**  
 Graph shows sensitivity of osteosarcoma lines to ATRi (a) AZD-6738, (b) VE-822 and (c) BAY-1895344, grouped by ALT status. Data represent AUC deduced from concentration response survival curves. Values summarise outcome from two repeats for each cell line. Bars indicate median AUC and 95% confidence interval for each group. Mann-Whitney U test specified (a)  $p=0.3008$  (ns), (b)  $p=0.3180$  (ns), (c)  $p=0.0197$  (\*).

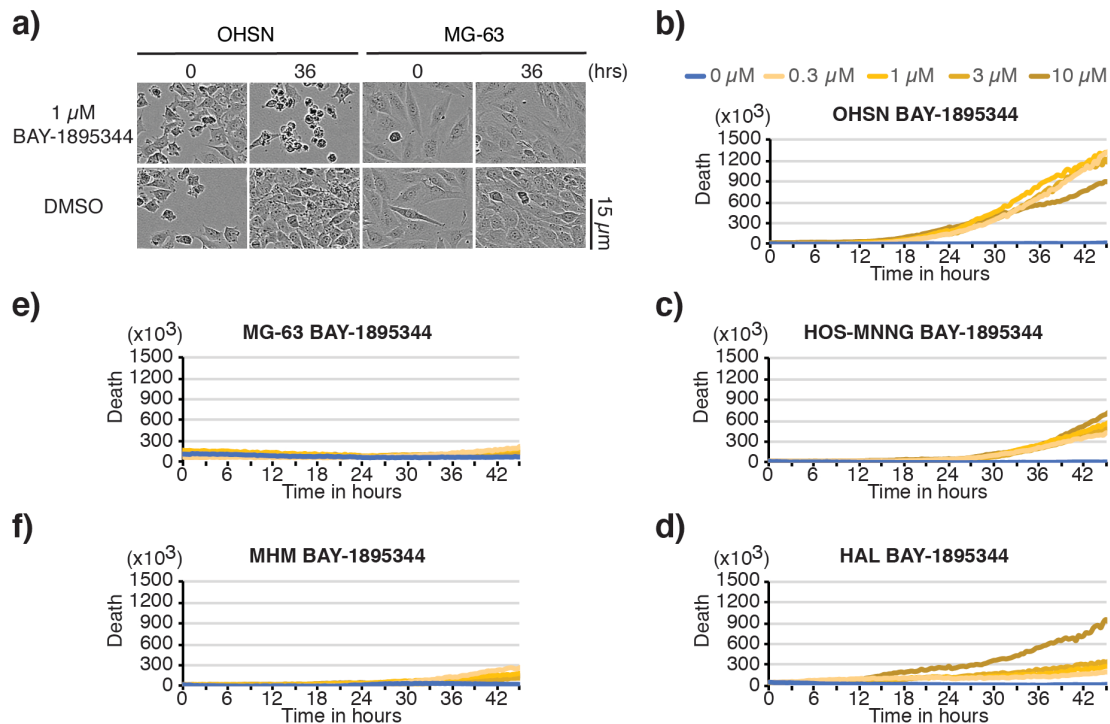

**Figure S-6 – Selective death of osteosarcoma with short telomeres exposed to ATR inhibitor BAY-1895344**

Short telomere cell lines, OHSN, HOS-MNNG and HAL, and long telomere cell lines, MG-63 and MHM, were treated with VE-822 at the concentration of 0  $\mu\text{M}$ , 0.3  $\mu\text{M}$ , 1  $\mu\text{M}$  and 3  $\mu\text{M}$  and were monitored by *IncuCyte live cell analysis*.

a) Representative images of OHSN and MG-63 with DMSO only and with 1  $\mu\text{M}$  BAY-1895344 at the indicated time are shown. Sample analysis was in the absence of SYTOX<sup>TM</sup> green death dye and fluorescence imaging. A 15- $\mu\text{m}$  scale bar is shown.

b-f) Representative graphs showing net death over-time for b) OHSN, c) HOS-MNNG, d) HAL, e) MG-63 and f) MHM. Graphs represent one of  $n=2$  independent datasets.



### Supplementary References:

1. Fodstad, O., Brogger, A., Bruland, O., Solheim, O. P., Nesland, J. M., and Pihl, A. (1986) Characteristics of a cell line established from a patient with multiple osteosarcoma, appearing 13 years after treatment for bilateral retinoblastoma, *International journal of cancer. Journal international du cancer* 38, 33-40. DOI: 10.1002/ijc.2910380107.
2. Kjonniksen, I., Winderen, M., Bruland, O., and Fodstad, O. (1994) Validity and usefulness of human tumor models established by intratibial cell inoculation in nude rats, *Cancer research* 54, 1715-1719.
3. Bruland, O. S., Fodstad, O., Stenwig, A. E., and Pihl, A. (1988) Expression and characteristics of a novel human osteosarcoma-associated cell surface antigen, *Cancer research* 48, 5302-5309.
4. Jia, S. F., Worth, L. L., and Kleinerman, E. S. (1999) A nude mouse model of human osteosarcoma lung metastases for evaluating new therapeutic strategies, *Clin Exp Metastasis* 17, 501-506.
